1     Antagonistic pathogen-mediated selection favours the maintenance of innate  
2                   immune gene polymorphism in a widespread wild ungulate

3

4     Erwan Quéméré<sup>1,2,3\*</sup>, Pauline Hessenauer<sup>4</sup>, Maxime Galan<sup>4</sup>, Marie Fernandez<sup>1,2</sup>, Joël Merlet<sup>1,2</sup>, Yannick  
5     Chaval<sup>1,2</sup>, Nicolas Morellet<sup>1,2</sup>, Hélène Verheyden<sup>1,2</sup>, Emmanuelle Gilot-Fromont<sup>6,7</sup>, Nathalie Charbonnel<sup>5</sup>

6     <sup>1</sup> Université de Toulouse, INRAE, CEFS, 31320, Castanet-Tolosan, France

7     <sup>2</sup> LTSER ZA PYRénées GARonne, 31320, Auzeville-Tolosane, France

8     <sup>3</sup> ESE, Ecology and Ecosystems Health, Agrocampus Ouest, INRAE, 35042 Rennes, France

9     <sup>4</sup> Département de Foresterie, Université Laval, Quebec, Canada

10    <sup>5</sup> CBGP, INRAE, CIRAD, IRD, Montpellier SupAgro, Univ Montpellier, Montpellier, France

11    <sup>6</sup> Université de Lyon, Université Lyon 1, UMR CNRS 5558, Villeurbanne, France,

12    <sup>7</sup> Université de Lyon, VetAgro Sup, Marcy l'Étoile, France

13

14    \* Corresponding author:

15    erwan.quemere@inrae.fr. Phone: (+33) 223 485 234.

16

17    Running title: Antagonistic pathogen-mediated selection in *Tlr* genes

18    Word count: 5042 words

19 **Abstract** (229 words)

20 Toll-like Receptors (TLR) play a central role in recognition and host frontline defence against a wide  
21 range of pathogens. A number of recent studies have shown that TLR genes (*Tlrs*) often exhibit a  
22 large polymorphism in natural populations. Yet, there is little knowledge on how this polymorphism  
23 is maintained and how it influences disease susceptibility in the wild. In a previous work, we showed  
24 that some *Tlrs* exhibit similarly high levels of genetic diversity than *Mhc* and contemporary signatures  
25 of balancing selection in roe deer (*Capreolus capreolus*), an abundant and widespread ungulate in  
26 Europe. Here, we tested whether *Mhc-Drb* or *Tlr* (*Tlr2*, *Tlr4* and *Tlr5*) diversity is driven by  
27 pathogen-mediated selection. We examined the relationships between their genotype  
28 (heterozygosity status and presence of specific alleles) and infections with *Toxoplasma* and  
29 *Chlamydia*, two intracellular pathogens known to cause reproductive failure in ungulates. We  
30 showed that *Toxoplasma* and *Chlamydia* exposures vary significantly across year and landscape  
31 structure with few co-infection events detected, and that the two pathogens act antagonistically on  
32 *Tlr2* polymorphism. By contrast, we found no evidence of association with *Mhc-Drb* and a limited  
33 support for *Tlr* heterozygosity advantage. Our study confirmed the importance of looking beyond  
34 *Mhc* genes in wildlife immunogenetic studies. It also emphasized the necessity to consider multiple  
35 pathogen challenges and their spatiotemporal variation to improve our understanding of vertebrate  
36 defence evolution against pathogens.

37 **Keywords:** Toll-like genes, antagonistic effects, balancing selection, habitat heterogeneity, roe deer

38 **Running title:** Antagonistic selection on *Tlr* genes in deer

## 39 1. INTRODUCTION

40 While evolutionary theory predicts that selection and random drift should deplete genetic diversity, a  
41 number of genes and genomic regions have maintained abundant polymorphism in natural  
42 populations with exceptionally high ratio of non-synonymous (protein-altering) to synonymous  
43 substitutions (Trowsdale and Parham, 2004; Hedrick, 2006). Balancing selection is a collective term  
44 for evolutionary processes that adaptively maintain variation in populations. It is a widespread  
45 process driving the diversity of genes involved in numerous biological functions including pathogen  
46 resistance (Sommer, 2005), color polymorphism (Wellenreuther, 2017) or mate choice/male  
47 competitiveness (Moore and Moore, 1999; Johnston *et al.*, 2013). There is an intense debate about  
48 the mechanisms driving balancing selection, with three primary hypotheses (putting aside “sexual  
49 selection”): the “heterozygote advantage” (Lewontin and Hubby, 1966; Doherty and Zinkernagel,  
50 1975), the “fluctuating selection” over time and space (Levene, 1953; Hill, 1991) and the “negative  
51 frequency-dependent selection” (also called rare-allele advantage) (Takahata and Nei, 1990; Phillips  
52 *et al.*, 2018). Disentangling these three mechanisms in natural systems is particularly challenging  
53 since they can operate in synergy and are not-mutually exclusive (Spurgin and Richardson, 2010).

54 Immunity-related genes are ideal candidates for studying how adaptive genetic diversity is  
55 maintained in wild populations because of their direct effect on survival (Møller and Saino, 2004) or  
56 reproductive success (Pedersen and Greives, 2008). The genes of the major histocompatibility  
57 complex (MHC) are often used as a model since they show an exceptional polymorphism in  
58 vertebrates (Spurgin and Richardson, 2010). Their structure and mechanisms of interaction with  
59 antigens are well described (Klein & Figueroa, 1986). Furthermore, their ability to trigger a rapid  
60 adaptive response to varying pathogen-mediated selective pressures (PMS) has been demonstrated  
61 experimentally (Eizaguirre *et al.*, 2012; Phillips *et al.*, 2018). Over the last few years, a growing body  
62 of literature identified PMS at *Mhc* genes in a large range of taxa (see Spurgin & Richardson, 2010 for  
63 a review) but few of them convincingly elucidated the relative influence of the three mechanisms  
64 mentioned above (but see Oliver *et al.*, 2009; Philips *et al.*, 2018). One likely reason is that most  
65 studies analysed associations between a single gene (most often a *Mhc* gene) and only one  
66 pathogen. However, decreasing sequencing costs now offer new opportunities to examine multiple  
67 genes and diseases in a single study, leading to a more realistic view of the functioning of the  
68 immune system and of the ecological context in which it evolves.

69 *Mhc*, although important, only corresponds to a fraction of the genetic variation in pathogen  
70 resistance (Acevedo-Whitehouse and Cunningham, 2006). Before the adaptive immunity has an  
71 opportunity to intervene in the host response, invading pathogens interact with different effectors of

72 innate immunity that recognize specific structures (Jepson *et al.*, 1997; Lam-Yuk-Tseung and Gros,  
73 2003). Therefore many genes encoding proteins involved in pathogen recognition or immune  
74 regulation may be associated with the resistance against the same pathogen (Turner *et al.*, 2011). In  
75 particular, genes encoding Toll-like receptors (TLR) play a key role in the host frontline defence  
76 against a wide range of microparasites such as fungi, bacteria, protozoa. This family of genes  
77 conserved in both invertebrate and vertebrate lineages are critical for the stimulation of many  
78 immune pathways such as inflammation, innate or acquired immunity (Akira *et al.*, 2001). A  
79 multitude of studies have revealed associations between *Tlr* gene polymorphism and infectious  
80 diseases in humans and domestic species (Mun *et al.*, 2003; Yang and Joyee, 2008). However, very  
81 few (most focusing on birds or rodents) have investigated their role in host-pathogen interactions in  
82 natural environment and their contemporary mechanisms of evolution at a population level (but see  
83 Kloch *et al.*, 2018; Tschirren *et al.*, 2013).

84 Moreover, infection with multiple pathogens is a real world rule (Maizels and Nussey, 2013) and  
85 some selective mechanisms such as heterozygous advantage or fluctuating selection may better be  
86 detected when accounting for the multi-pathogen context (Wegner *et al.*, 2003; Sin *et al.*, 2014).  
87 Most immunity-related genes have pleiotropic effects on resistance against several pathogens  
88 (Hedrick, 1999) and the maintenance of ‘susceptible’ (deleterious) alleles in a wild population can be  
89 due to antagonist effects of a given immunity-related gene on several pathogens (*i.e.* antagonistic  
90 pleiotropy). To date, only few studies have examined the selective effects of multiple pathogens on  
91 host immunogenetic patterns and the great majority focused on *Mhc* genes (Tollenaere *et al.*, 2008  
92 on voles; Loiseau *et al.*, 2008 on house sparrows ; Kamath *et al.*, 2014 in plain zebras; Froeschke &  
93 Sommer, 2012 on striped mouse but see Dubois *et al.*, 2017, Antonides *et al.*, 2019).

94 Here, we investigated the selective mechanisms by which multiple pathogens could drive the  
95 genetic diversity of immunity-related genes in a free-ranging population of European roe deer  
96 (*Capreolus capreolus*) inhabiting an agricultural landscape in Southwestern France. We focused on  
97 four genes encoding pattern-recognition receptors (PRRs) that detect specific microbes or pathogen-  
98 associated molecular patterns: the widely-used *Mhc class II-Drb* gene and three non-*Mhc* genes  
99 encoding Toll-like receptors genes (*Tlr2*, *Tlr4*, *Tlr5*). In a recent work, we showed that these genes  
100 exhibit high levels of amino acid diversity within French roe deer populations including the  
101 population studied here, hence suggesting an important functional repertoire (Quéméré *et al.*, 2015).  
102 In particular, *Tlr2* and *Tlr4* exhibited several haplotypes at moderate frequency and very low levels of  
103 differentiation among roe deer populations compared to the patterns obtained with neutral markers.  
104 These findings support the hypothesis that the polymorphism of these genes is shaped by balancing  
105 selection although the underlying mechanism(s) remains to be investigated.

106 The study population is heavily exposed to a range of pathogens that also infect livestock,  
107 including the abortive *Toxoplasma gondii* or *Chlamydia abortus* (Candela *et al.*, 2014). These two  
108 pathogens have negative influence on the survival and reproductive performances of ungulates (Pioz  
109 *et al.*, 2008; Dubey, 2009). It can therefore be assumed that they exert selective pressures on  
110 immunity-related genes and in particular on *Tlr* genes that play a major role in host defence against  
111 protozoans and gram-negative bacteria (Gazzinelli and Denkers, 2006; Yarovinsky, 2008; Miller *et al.*,  
112 2009; Beckett *et al.*, 2012; Netea *et al.*, 2012). To test this hypothesis, we first established whether  
113 there are biological (age, sex) and/or environmental patterns (year, landscape structure) in  
114 *Toxoplasma* and *Chlamydia* infectious status across hosts. Then, we analysed whether pathogen  
115 prevalence was associated with specific patterns of genetic variation observed at the four immunity-  
116 related genes, while accounting for biological/environmental heterogeneity. Specifically, we tested  
117 whether (i) particular alleles are associated with lower or higher pathogen prevalence (directional  
118 selection) and (ii) heterozygous individuals exhibit a lower prevalence than homozygotes  
119 (heterozygote advantage). Support for the “heterozygote advantage” hypothesis has been found in  
120 many *Mhc* gene studies of mammals (Oliver *et al.*, 2009; Hedrick, 2012; Sin *et al.*, 2014), including  
121 wild ungulates (Paterson *et al.*, 1998; Brambilla *et al.*, 2018). The importance of this hypothesis for  
122 innate immunity-related genes has rarely been assessed (but see Antonides *et al.*, 2019; Grueber *et*  
123 *al.*, 2013) but a recent study in birds (Grueber, Wallis, & Jamieson, 2013) has found evidence for  
124 survival advantage associated with *Tlr4* heterozygote genotypes. Moreover, *Mhc* and *Tlr* genes are  
125 known to have pleiotropic effects on the resistance/susceptibility to pathogens harboring similar  
126 pathogen-associated molecular patterns (Hedrick, 1999; Kaisho and Akira, 2004; Loiseau *et al.*, 2008).  
127 Since *Toxoplasma* and *Chlamydia* employ similar strategies to invade host cells (Romano and  
128 Coppens, 2013), we expect that they should both exert selective pressures on same genes, but with  
129 potentially antagonistic effects if the same allele confer resistance to a pathogen and susceptibility to  
130 the other (i.e. “antagonistic pleiotropy”, Kubinak *et al.*, 2012).

## 131 2. MATERIAL AND METHODS

### 132 2.1 Study population and data collection

133 The study focused on a roe deer population inhabiting a heterogeneous agricultural landscape in  
134 Southern France (43°13'N, 0°52'E). This area called “Vallons et Côteaux de Gascogne” (VCG) is part  
135 of the Atelier Pyrénées Garonne (<https://pygar.omp.eu/>). Individuals were caught by drive-netting  
136 during winter (from January to March) between 2008 and 2016. The sampling area consisted of  
137 three sectors with contrasting landscape structure with regard to the proportion of woodland: a  
138 “closed” sector with two forest blocks, an “open” landscape including mainly meadows, crops and

139 pastures with few fragmented woodlots, and an “intermediate” sector with inter-connected  
140 woodland fragments (Hewison *et al.*, 2009). Deer from these three sectors belong to the same  
141 panmictic population (Coulon *et al.*, 2006; Gervais *et al.*, 2019). Individual sex, age class (juveniles:  $\leq$   
142 1 year of age versus adults:  $>$  1 year of age) and body mass were recorded. Blood samples were  
143 collected for pathogen screening (see below) and ear punches for genetic analyses. In total, we  
144 gathered samples from 433 annual captures corresponding to 328 different individuals (190 females  
145 and 138 males, 164 juveniles and 164 adults) among which 157 deer had been included in a previous  
146 immunogenetic studies (Quéméré *et al.*, 2015). All applicable institutional and European guidelines  
147 for the care and use of animals were followed. The study was permitted by the land manager. All the  
148 procedures involving animals were approved by the Ethical Committee 115 of Toulouse and  
149 authorized by the French Ministry in charge of ethical evaluation (n° APAFIS#7880-  
150 2016120209523619v5).

## 151 **2.2 *Tlr* and *Mhc-Drb* genotyping**

152 The *Mhc-Drb* class II and *Tlr* (*Tlr2*, *Tlr4* and *Tlr5*) genes of 157 roe deer from VCG had been genotyped  
153 in a previous study (Quéméré *et al.*, 2015). We completed this dataset by genotyping 171 new  
154 individuals using exactly the same procedure. DNA was extracted from alcohol-preserved tissues  
155 using the DNeasy Blood and Tissue kit (QIAGEN). *Tlr* genes were genotyped using a two-step  
156 approach: a pilot study on 32 individuals was first performed to identify polymorphic sites (SNPs) and  
157 linkage-disequilibrium (LD) groups. We screened almost the entire coding region of the three *Tlr*  
158 genes (82% in average) including the leucine-rich extracellular region of receptors involved in  
159 antigen-binding. Detailed on primer sequences, SNP positions and codon changes are provided in  
160 Quéméré *et al.* (2015). We then selected one SNP per LD group (primarily targeting non-synonymous  
161 sites) that was genotyped for all individuals using the KASPar allele-specific genotyping system  
162 provided by KBiosciences (Hoddesdon, UK). A total of 13 SNPs were typed including 5, 3 and 5 SNPs  
163 for *Tlr2*, *Tlr4* and *Tlr5* respectively. Details on SNP position and codon change can be found in Table  
164 S1. Lastly, haplotypes were reconstructed from the phased SNPs using the procedure implemented in  
165 DNASP v5 (Librado & Rozas, 2008). The second exon of the *Mhc-Drb* class II gene encoding the ligand-  
166 binding domain of the protein was amplified and sequenced using Illumina MiSeq system as detailed  
167 in Quéméré *et al.* (2015). Haplotypes and individual genotypes were identified using the SESAME  
168 barcode software (Piry *et al.*, 2012). All sequences have been submitted to NCBI Genbank (Accession  
169 nos. are in Table S2, Supporting information).

## 170 **2.3 Pathogen screening**

171 The serological status of roe deer for *Toxoplasma gondii* and/or *Chlamydia abortus* was analysed  
172 using classical enzyme-linked immunosorbent assays (ELISA) with specific commercial kits (Sevila *et al.*, 2014). The specificity and sensitivity of these kits were respectively 97.4 and 99.4 % for *T. gondii*  
173 and 92.2 and 89 % for *C. abortus*. Although the kits were developed for domestic ruminants, they  
174 were shown to be reliable and efficient in wild ungulates (Gotteland *et al.*, 2014) with a good  
175 concordance with classical test (e.g. high concordance (0.8) between ELISA and the Modified  
176 Agglutination Test, a reference test for *Toxoplasma* in roe deer). According to the manufacturer's  
177 instructions, blood samples with antibody recognition level (ARL) > 30% (respectively 40%) were  
178 considered positive for *T. gondii* (respectively *C. abortus*) (see Sevila *et al.*, 2014 for further details).  
179 In total, we obtained the *Toxoplasma* and *Chlamydia* serological status of 277 (with 74 repeated  
180 measures) and 196 (36 repeated measures) roe deer respectively (caught between 2008 and 2016,  
181 Table S3). The individual repeatability (R) and its standard error (SE) for *Toxoplasma* and *Chlamydia*  
182 seroprevalence were calculated using the R package 'rptR' (Stoffel *et al.*, 2017). The proportion of  
183 individuals seropositive for both *Toxoplasma* and *Chlamydia* was examined in the years where both  
184 pathogens were screened (between 2008 and 2013).  
185

## 186 **2.4 Statistical analyses**

187 We analysed the influence of immunity-related gene variation, environmental and life-history factors  
188 on the seroprevalence of *T. gondii* or *C. abortus* (binary response variable – presence/absence) using  
189 generalized linear mixed-effect models (GLMM) with a binomial family (using a logit link function).  
190 Analyses were performed using the *glmer* function implemented in the 'lme4' package (Bates *et al.*,  
191 2012) and 'MuMin' v1.7.7 (Barton, 2009) in R version 3.3.3 (R Development Core Team, 2017). In the  
192 first step, we investigated the effects of non-genetic biological and environmental factors that  
193 possibly affect pathogen exposure. The starting model included roe deer sex (male *versus* female)  
194 and age-class (juvenile *versus* adult) because both behaviour and host susceptibility may vary  
195 between sexes and across an individual's lifetime (Klein, 2000) and because infection persistence is  
196 expected to result in a positive age-prevalence relationship (Gotteland *et al.*, 2014). We also included  
197 the capture year (9 levels) and sectors (3 levels) as fixed effects to account for the inter-annual and  
198 among-landscapes variation in environmental conditions that may affect pathogen survival and thus  
199 encounter probability (e.g. climate, food resources, population density). Roe deer classically inhabit a  
200 single home range of relatively small (mean 0.76 km<sup>2</sup>) across their entire adult life (Morellet *et al.*,  
201 2013). In this study, roe deer home range was generally part of a unique capture sector. In all  
202 models, we included individual identity as a random effect to account for correlation amongst  
203 different observations of the same individual. We conducted an initial exploration of our data to  
204 ascertain their distribution and identify potential outliers (Zuur *et al.*, 2009). We used a model

205 selection procedure using Akaike information criterion with a correction for small sample sizes ( $AIC_c$ )  
206 to determine which model best explained variation in pathogen infection (models with lowest AIC).  
207 We only examined models with  $\Delta AIC < 2$  relative to the best model. Significant variables were  
208 retained in a reduced model for use in step 2.

209 In the second step, we investigated the “heterozygote advantage hypothesis” by fitting a binary  
210 fixed effect (heterozygote vs homozygote) and the “allele advantage” hypothesis by considering  
211 associations between the infection status and the number of copies (0, 1 or 2) of the most or second  
212 most frequent haplotype of *Tlr2*, *Tlr4*, *Tlr5* and *MHC-Drb*. We used variance inflation factors (VIF) to  
213 measure collinearity among predictors and retained variables with VIF values  $< 3$  (Zuur *et al.*, 2009).  
214 To minimize multicollinearity, the effects of the two most frequent haplotypes of a gene and its  
215 heterozygosity were evaluated in separate models. The identity of year and sector (for *Toxoplasma*)  
216 and year (for *Chlamydia*) were included as random effects in all models because (i) individuals at a  
217 sector and/or year all experience similar conditions of exposure (see the results of step 1) and (ii) to  
218 account for spatial and/or temporal autocorrelation in allele frequencies that may lead to spurious  
219 associations with pathogen prevalence. In total, 256 candidate models were evaluated for both  
220 *Toxoplasma* and *Chlamydia* (see Table S4 for the full list of models).

### 221 3. RESULTS

#### 222 3.1 Immunogenetic variation

223 Among the 293 tested individuals, we found nine functional alleles for *Mhc* class II-*Drb* gene, coding  
224 for different amino acid sequences. One haplotype (CacaDRB\*0302) was common (60%), two other  
225 (CacaDRB\*0201 and CacaDRB\*0102) had intermediate frequency (18% and 10% respectively) while  
226 the six others were rare ( $< 5\%$ ). Observed heterozygosity ( $H_o$ ) reached 0.55. We isolated six different  
227 haplotypes for *Tlr2* in 327 genotyped individuals, all corresponding to different amino acids  
228 sequences. Two haplotypes (*Tlr2-2*: “TGCCG” and *Tlr2-1*: “CATCG”) and showed particularly high  
229 frequency (51% and 35% respectively) while the four others were rare ( $< 5\%$ ). The two most common  
230 haplotypes belonged to two highly divergent genetic clusters and were separated by seven  
231 substitutions (including four non-synonymous ones) (Quéméré *et al.*, 2015). The *Tlr4* gene exhibited  
232 four functional haplotypes in 327 individuals including two haplotypes (“CGG” and “GAG”) with  
233 moderate to high frequency (26% and 55% respectively) and two haplotypes with low frequencies  
234 (10% and 7%). Lastly, we isolated six haplotypes (in 324 individuals) for the *Tlr5* among which two  
235 (“GCTCG”, “ACCTG”) had high frequencies (38% and 31% respectively), one (“ATCCG”) had  
236 intermediate frequency (18%) and the three others were rare ( $< 5\%$ ). Observed heterozygosity was  
237 relatively high for the three *Tlr* genes ( $H_o = 0.62, 0.64$  and  $0.69$ , *Tlr2*, *Tlr4* and *Tlr5* respectively).



### 238 3.2 Ecological patterns of parasitism

239 Seroprevalence of *Toxoplasma* reached 35% and was moderately repeatable among years at the  
240 individual level ( $R=0.21$ ,  $SE=0.06$   $P$ -value=0.002) By comparison, seroprevalence of *Chlamydia* was  
241 lower (16%) but showed a higher individual consistency among capture events ( $R=0.70$ ,  $SE=0.05$ ,  $P$ -  
242 value<0.001). Among the 232 annual captures for which both pathogens were screened (196  
243 different deer), only 18 individuals (7%) had anti-*Toxoplasma* and anti-*Chlamydia* antibodies  
244 simultaneously while 93 (40%) and 36 (15%) animals were seropositive solely for *Toxoplasma* and  
245 *Chlamydia* respectively (Table 1). We found a strong effect of “the year of capture” for the two  
246 pathogens with an increased probability of being seropositive for *Toxoplasma* in 2009 and 2010  
247 (Seroprevalence = 83% and 56% respectively) and a decreased seroprevalence in 2009 for *Chlamydia*  
248 (16%) (Table 1). Additionally, we revealed a significant relationship between *Toxoplasma* infection  
249 status, age and landscape structure: antibody prevalence was higher in adults and in the “open”  
250 sector (Table S5, Table S6).

### 251 3.3 Genetic effects on pathogen infection

252 The inclusion of *Tlr2* genotype significantly improved the *Toxoplasma* infection non-genetic model.  
253 The best-fitted model ( $\Delta AICc = -5.71$  with non-genetic model) (Table 2) included a positive effect of  
254 the number of copies of the “TGCCG” haplotype of *Tlr2* (*Tlr2-2*). Roe deer carrying two copies of this  
255 frequent haplotype (51%) showed a decreased *Toxoplasma* seroprevalence (odd ratio OR = 0.29  
256 [0.11-0.77]) compared to individuals without this haplotype (Figure 1a, Table S7). Model including  
257 the second most-frequent haplotype “CATCG” (*Tlr2-1*) was poorly supported ( $\Delta AICc = 3.58$  with the  
258 best model): *Toxoplasma* prevalence substantially increased for deer carrying one copy of *Tlr2-1* (OR  
259 = 2.41 [1.15-5.07]) but this effect was not additive. Individuals with two copies showed similar  
260 seroprevalence (OR=2.21 [0.75-6.48]). In a post-hoc analysis, we re-run this model by including a  
261 dominant rather than an additive effect of *Tlr2-1* (presence/absence of the allele) and this greatly  
262 improved the model performance ( $\Delta AICc = 1.56$  with the best model) (Figure 1b). Deer carrying at  
263 least on *Tlr2-1* copy had a decreased *Toxoplasma* seroprevalence. We did not detect any association  
264 between *Toxoplasma* infection and *Tlr4*, *Tlr5* or *Mhc-Drb* genetic variation.

265 Similarly to *Toxoplasma*, we found a strong relationship between *Tlr2* genotype and *Chlamydia*  
266 seroprevalence (Table 2) with the best ( $\Delta AICc = -7.35$  with non-genetic model) and second-best fitted  
267 models ( $\Delta AICc = -5.96$ ) including the number of copies of the “TGCCG” (*Tlr2-2*) and “CATCG” (*Tlr2-1*)  
268 haplotypes respectively. However, we observed the opposite pattern of association than for  
269 *Toxoplasma*: homozygous individuals for the most-common haplotype (*Tlr2-2*) had an increased  
270 probability to be seropositive (OR = 3.81 [1.13-12.89]) while individuals carrying *Tlr2-1* were less

271 likely to be seropositive for *Chlamydia* (OR = 0.09 [0.01, 0.82] for “CATCG” homozygous deer) (Figure  
272 1a, 1c, Table S8). The best-fitted model also revealed an association between *Tlr5* genotype and  
273 *Chlamydia* seroprevalence: roe deer with the “ACCTG” (*Tlr5*-2, 31%) haplotype were less likely to be  
274 *Chlamydia* seropositive (OR = 0.28[0.11, 0.72]). No association was observed when considering *Mhc*-  
275 *Drb* and *Tlr4* genotypes (neither number of alleles nor heterozygosity status).

#### 276 4. DISCUSSION

277 Being evolutionary ancient and under strong functional constraints, genes involved in innate immune  
278 responses are expected to evolve primarily under purifying selection and to exhibit limited  
279 polymorphism (Parham, 2003). Yet, it is now quite clear that some of these genes, including *Tlr* genes  
280 encoding surface recognition receptors, may have relaxed selective constraints and show large  
281 nucleotide diversity, sometimes comparable to *Mhc* genes (Seabury *et al.*, 2011). In a previous work,  
282 we have shown that the high sequence and allelic diversity observed at roe deer *Tlr* genes could be  
283 maintained through balancing selection (Quéméré *et al.*, 2015). In this study, we developed a multi-  
284 gene/multi-pathogen association approach to bring new insights into the mechanisms underlying  
285 such balancing selection. Our results suggested a key role of directional selection on specific *Tlr*  
286 haplotypes rather than heterozygote advantage. We showed that different *Tlr* genes may be  
287 associated with resistance to the same microparasite (here *Tlr2* and *Tlr5* with *Chlamydia*) in  
288 agreement with the general idea that pathogens interact with many immune recognition receptors.  
289 We also revealed that different pathogens may act antagonistically on the polymorphism of a given  
290 gene (here *Tlr2* with *Toxoplasma* and *Chlamydia*).

##### 291 4.1. High temporal and spatial variation in pathogen exposure

292 Our results revealed a high temporal heterogeneity in both pathogen seroprevalence at individual  
293 and population levels. In contrast with the traditional view of lifelong persistence of *Toxoplasma*  
294 infection (Tenter *et al.*, 2000), we observed low individual repeatability of *Toxoplasma*  
295 seroprevalence at the within-individual level (R=0.21). This is in line with a previous study on the  
296 same population that reported frequent seroconversion with initially seropositive individuals  
297 becoming seronegative within 1 to 3 years (Sevila *et al.*, 2014). *Toxoplasma* seroprevalence increased  
298 with roe deer age as frequently observed in wild ungulate populations, but it is most likely due to  
299 repeated exposure from the same environment rather than antibody persistence (Opsteegh *et al.*,  
300 2011; Gotteland *et al.*, 2014). Overall, this suggests that the presence of antibodies in the study  
301 population would reflect relatively recent rather than long-term infection. The observed annual  
302 variation in pathogen prevalence at population level may be related to both climate and host factors.  
303 Meteorological conditions such as temperature or humidity are known to affect pathogen survival in

304 the environment and may influence host transmission *via* the quantity of infected aerosols for  
305 *Chlamydia* (Tang, 2009) or oocysts for *Toxoplasma* (Gotteland *et al.*, 2014). For example, Sevilla *et al.*  
306 (2014) showed that *Toxoplasma* prevalence in roe deer was higher in mild and wet years and that  
307 *Chlamydia* prevalence increased in cold years. The high turnover of individuals in the population in  
308 relation with a strong harvest pressure may also partly explain why we observed a so high inter-  
309 annual variability in multi-cohort samples (Candela *et al.*, 2014). Moreover, we also observed a  
310 strong variation in *Toxoplasma* exposure across sampling sectors that most likely results from  
311 landscape heterogeneity (e.g. exposure increase with the proportion of human dwellings within  
312 home range as a proxy of the cat presence, Sevilla *et al.*, 2014).

#### 313 **4.2 Predominant role of directional selection on *Tlr* gene variation**

314 We revealed that *Tlr2* gene polymorphism is partly shaped by directional selection exerted by both  
315 *Toxoplasma* and *Chlamydia*. Roe deer carrying the most frequent *Tlr2* haplotype were less likely to  
316 be infected by *Toxoplasma* but more likely infected by *Chlamydia*. The opposite pattern was revealed  
317 for the second most frequent haplotype. These two abortive pathogens may have significant impact  
318 on the annual reproductive success of ungulates (Pioz *et al.*, 2008). TLRs have been shown to activate  
319 the complement system, a component of innate immunity known to be important for resistance to  
320 microparasites during early infection (Raby *et al.*, 2011). A higher affinity of a *Tlr* haplotype to  
321 *Toxoplasma* or *Chlamydia* ligands may result in a stronger complement response and thus in an  
322 increased resistance to these pathogens (Tschirren *et al.*, 2013).

323 Spatial and temporal variations in pathogen-mediated directional selection suggest that the role  
324 of *Tlr2* haplotypes in roe deer resistance or susceptibility to *Toxoplasma* and *Chlamydia* may vary  
325 among years and among landscape structures where females established their home range. This  
326 supports the general idea that different habitats in terms of biotic and abiotic factors are likely to  
327 support distinct pathogen communities and so distinct pathogen-mediated-selection regime  
328 (Hedrick, 2002; Eizaguirre and Lenz, 2010). However, this result alone is not sufficient to demonstrate  
329 that fluctuating selection could favour the maintenance of *Tlr* genes' balanced polymorphism in this  
330 population. Indeed, further data using longer time series are required to explicitly test whether  
331 *Toxoplasma* and *Chlamydia* prevalence are negatively correlated in space and/or time, which is a  
332 prerequisite for demonstrating that selection pressures are fluctuating (Spurgin and Richardson,  
333 2010). Still few empirical studies have succeeded in providing evidence that fluctuating selection  
334 mediated immunogenetic variation, although they highlighted *Mhc* genetic diversity variation across  
335 space in a mosaic of habitats likely (Landry and Bernatchez, 2001; Alcaide *et al.*, 2008; Eizaguirre and  
336 Lenz, 2010).

### 337 4.3 Antagonistic pleiotropy and potential immunogenetic trade-off

338 Interestingly, we observed that different haplotypes of a same *Tlr* gene (here *Tlr2*) may be associated  
339 with the infection status of the two pathogens. Pleiotropic effects in *Tlr2* were expected since this  
340 receptor is known to be implicated in the recognition of many bacterial, fungal, protozoa (de Oliveira  
341 Nascimento *et al.*, 2012) including *Toxoplasma* (Yarovinsky, 2008) and *Chlamydia* (Darville *et al.*,  
342 2003; Beckett *et al.*, 2012). Here, the most common *Tlr2* haplotype was associated with decreased  
343 *Toxoplasma* infection and increased *Chlamydia* infection while the concurrent haplotype showed the  
344 opposite trend. This result provides an example of antagonistic pleiotropy, which has been proposed  
345 as a widespread mechanism favouring the maintenance of genetic variation within populations  
346 (Rose, 1982; Roff and Fairbairn, 2007), in particular at immunity-related genes (Aderem and Ulevitch,  
347 2000; Carter and Nguyen, 2011). Antagonistic pleiotropy has rarely been evidenced in natural  
348 populations (Turner *et al.*, 2011) and, to our knowledge, this study is the first demonstration with  
349 regard to a *Tlr* gene. Two non-exclusive mechanisms may be invoked to explain this antagonistic  
350 effect: decrease of intracellular pathogen competition (Loiseau *et al.*, 2008) and host immunogenetic  
351 trade-off (Kamath *et al.*, 2014). *Toxoplasma* and *Chlamydia* use similar strategies to invade cells  
352 route and compete for the same nutrient pools in co-infected cells (Romano and Coppens, 2013).  
353 Therefore, antagonistic effects might arise because *Tlr2* gene alters the competitive interactions  
354 between the two pathogens. In other words, because individuals carrying the most frequent *Tlr2*  
355 haplotype are less infected by *Toxoplasma*, this may indirectly promote infection by *Chlamydia*  
356 without a direct role of the second most frequent haplotype (and *vice versa*). In a study of house  
357 sparrows, Loiseau *et al.* (2008) found antagonistic effects of a *Mhc* class I gene on multiple malarial  
358 parasite strains. In this particular case, deleterious 'susceptibility alleles' could be maintained in the  
359 population due to within-host competition between malaria parasite strains. Here, because we  
360 observed relatively few co-infections, it is unlikely that antagonistic effect may result from the  
361 competitive interactions between *Toxoplasma* and *Chlamydia*.

362 The most likely hypothesis is the presence of a host immunogenetic trade-off (Kamath *et al.*,  
363 2014). In this case, pathogens do not directly compete but *Tlr2* genotype has a direct effect on the  
364 resistance/susceptibility to both pathogens. The allele inferred to be beneficial for decreasing  
365 *Toxoplasma* infection is also associated with increased susceptibility to *Chlamydia* (and *vice versa*).  
366 This scenario is reinforced by the fact that the two concurrent *Tlr2* haplotypes exhibit very distinct  
367 DNA and amino-acid sequences, what suggests marked functional differences. Similar patterns and  
368 processes have previously been described for ticks and nematodes infections (Kamath *et al.*, 2014;  
369 Turner *et al.*, 2011). To our knowledge, our study is the second one showing evidence of antagonistic  
370 selection at non-*Mhc* gene in a wild population (see for the other one Turner *et al.*, 2011).

#### 371 **4.4 Limited role of other genes and selective mechanisms**

372 While many empirical studies in a variety of organisms revealed signatures of pathogen-mediated  
373 directional or balancing in *Mhc* loci (see Bernatchez & Landry, 2003; Sommer, 2005; Spurgin &  
374 Richardson, 2010 for reviews), we did not find any association between *Mhc-Drb* and *Toxoplasma* or  
375 *Chlamydia*. This is congruent with the findings of Quéméré et al. (2015), who suggests that genetic  
376 drift and migration would be the predominant contemporary forces shaping *Mhc* variation in roe deer  
377 with no signature of contemporary selection (in contrast to *Tlr* genes). Moreover, the few studies  
378 showing associations between *Mhc* class II genetic diversity and pathogen infection in other wild  
379 ungulates focused on strongyle parasites (Paterson *et al.*, 1998; Charbonnel and Pemberton, 2005;  
380 Kamath *et al.*, 2014) while we looked at interactions with micro-pathogens. This supports the general  
381 idea that MHC class II molecules principally bind exogenous antigens and are primarily involved in  
382 the immune response to extracellular pathogens (Hughes and Yeager, 1998).

383 Our data provided a weak support for the “heterozygous advantage hypothesis”. We noted that  
384 most authors revealing heterozygous advantage in immunity-related genes (most often on *Mhc*  
385 genes) studied animals co-infected with multiple pathogens (Hughes & Nei, 1992; McClelland *et al.*,  
386 2003; Froeschke & Sommer, 2012 but see Oliver *et al.*, 2009). In our case, the lack of association with  
387 roe deer heterozygosity status could be due to the low individual’s probability of being exposed to  
388 both pathogens *Toxoplasma* and *Chlamydia* across their life-time, explaining the low fitness benefit  
389 of heterozygous genotypes. A limitation of this work is that we could not investigate the importance  
390 of other mechanisms such as negative frequency-dependent selection, because of insufficient  
391 statistical power to test the role of rare variants and the lack of long time series (see Charbonnel *et*  
392 *al.*, 2005 for an example).

#### 393 **5. Conclusion**

394 In conclusion, our study illustrates the importance of looking beyond *Mhc* genes (Acevedo-  
395 Whitehouse and Cunningham, 2006) and single snapshot gene/pathogen association (Maizels and  
396 Nussey, 2013) in wildlife immunogenetic studies. In the present case, we did not find any influence of  
397 *Mhc* diversity on the resistance to two microparasites. Moreover, we highlighted the importance of  
398 antagonistic effects on the maintenance of innate immunogenetic diversity, what could not have  
399 been possible using a classical single gene-single pathogen approach.

#### 400 **ACKNOWLEDGMENTS**

401 This work was supported by the French National Institute for Agricultural Research (INRA). We thank  
402 the local hunting associations, the Fédération Départementale des Chasseurs de Haute-Garonne. We

403 thank numerous co-workers and volunteers for their assistance in field data collection, in particular J-  
404 M. Angibault, B. Cargnelutti, J-L. Rames, J. Joachim, B. Lourtet, D. Picot and N. Cebe. We also thank  
405 Karine Laroucau and Rachid Aaziz from ANSES the laboratory for animal health in Maison-Alfort  
406 (France) for their support and expertise on *C. abortus* results. We also thank Monica G Candela, Julie  
407 Sevilla and co-workers for their support on laboratory work (serology). Genetic data used in this work  
408 were produced through molecular genetic analysis technical facilities of the labex “Centre  
409 Méditerranéen de l’Environnement et de la Biodiversité”.

410 **Data Archiving:** Haplotype DNA sequences: Primers and Genbank accessions are in Table S1. SNP  
411 positions and characteristics are in Table S2. Genotypes of all individuals at each *Tlr* and *Mhc-Drb*  
412 gene and environmental/parasitological data will be shared on Dryad: Dryad entry XXXXXXXXXXXX.

### 413 REFERENCES

- 414 Acevedo-Whitehouse K, Cunningham A (2006). Is MHC enough for understanding wildlife immunogenetics? *Trends Ecol Evol*  
415 **21**: 433–438.
- 416 Aderem A, Ulevitch RJ (2000). Toll-like receptors in the induction of the innate immune response. *Nature* **406**: 782.
- 417 Akira S, Takeda K, Kaisho T (2001). Toll-like receptors: critical proteins linking innate and acquired immunity. *Nat Immunol* **2**:  
418 675–680.
- 419 Alcaide M, Edwards SV, Negro JJ, Serrano D, Tella JL (2008). Extensive polymorphism and geographical variation at a  
420 positively selected MHC class II B gene of the lesser kestrel (*Falco naumanni*). *Mol Ecol* **17**: 2652–2665.
- 421 Antonides J, Mathur S, Sundaram M, Ricklefs R, DeWoody JA (2019). Immunogenetic response of the bananaquit in the face  
422 of malarial parasites. *BMC Evol Biol* **19**: 107.
- 423 Barton K (2009). MuMIn: multi-model inference. R package version 1. 0. 0. [Http://Forge.R-Project.org/projects/mumin](http://Forge.R-Project.org/projects/mumin).
- 424 Bates D, Maechler M, Bolker B (2012). lme4: Linear mixed-effects models using Eigen and S4 classes.
- 425 Beckett EL, Phipps S, Starkey MR, Horvat JC, Beagley KW, Foster PS, *et al.* (2012). TLR2, but not TLR4, is required for  
426 effective host defence against *Chlamydia* respiratory tract infection in early life. *PLoS One* **7**: e39460.
- 427 Bernatchez L, Landry C (2003). MHC studies in nonmodel vertebrates: what have we learned about natural selection in 15  
428 years? *J Evol Biol* **16**: 363–377.
- 429 Brambilla A, Keller L, Bassano B, Grossen C (2018). Heterozygosity–fitness correlation at the major histocompatibility  
430 complex despite low variation in Alpine ibex (*Capra ibex*). *Evol Appl* **11**: 631–644.
- 431 Candela MG, Serrano E, Sevilla J, León L, Caro MR, Verheyden H (2014). Pathogens of zoonotic and biological importance in  
432 roe deer (*Capreolus capreolus*): Seroprevalence in an agro-system population in France. *Res Vet Sci* **96**: 254–259.
- 433 Carter AJ, Nguyen AQ (2011). Antagonistic pleiotropy as a widespread mechanism for the maintenance of polymorphic  
434 disease alleles. *BMC Med Genet* **12**: 160.
- 435 Charbonnel N, Pemberton J (2005). A long-term genetic survey of an ungulate population reveals balancing selection acting  
436 on MHC through spatial and temporal fluctuations in selection. *Heredity* **95**: 377.
- 437 Coulon A, Guillot G, Cosson JF, Angibault JMA, Aulagnier S, Cargnelutti B, *et al.* (2006). Genetic structure is influenced by  
438 landscape features: empirical evidence from a roe deer population. *Mol Ecol* **15**: 1669–1679.

- 439 Darville T, O'Neill JM, Andrews CW, Nagarajan UM, Stahl L, Ojcius DM (2003). Toll-like receptor-2, but not Toll-like receptor-  
440 4, is essential for development of oviduct pathology in chlamydial genital tract infection. *J Immunol* **171**: 6187–  
441 6197.
- 442 Doherty PC, Zinkernagel RM (1975). Enhanced immunological surveillance in mice heterozygous at the H-2 gene complex.  
443 *Nature* **256**: 50.
- 444 Dubey JP (2009). Toxoplasmosis in sheep—the last 20 years. *Vet Parasitol* **163**: 1–14.
- 445 Dubois A, Galan M, Cosson J-F, Gauffre B, Henttonen H, Niemimaa J, *et al.* (2017). Microevolution of bank voles (*Myodes*  
446 *glareolus*) at neutral and immune-related genes during multiannual dynamic cycles: Consequences for Puumala  
447 hantavirus epidemiology. *Infect Genet Evol* **49**: 318–329.
- 448 Eizaguirre C, Lenz TL (2010). Major histocompatibility complex polymorphism: dynamics and consequences of parasite-  
449 mediated local adaptation in fishes. *J Fish Biol* **77**: 2023–2047.
- 450 Eizaguirre C, Lenz TL, Kalbe M, Milinski M (2012). Rapid and adaptive evolution of MHC genes under parasite selection in  
451 experimental vertebrate populations. *Nat Commun* **3**: 621.
- 452 Froeschke G, Sommer S (2012). Insights into the complex associations between MHC class II DRB polymorphism and  
453 multiple gastrointestinal parasite infestations in the striped mouse. *PLoS One* **7**: e31820.
- 454 Gazzinelli RT, Denkers EY (2006). Protozoan encounters with Toll-like receptor signalling pathways: implications for host  
455 parasitism. *Nat Rev Immunol* **6**: 895–906.
- 456 Gervais L, Perrier C, Bernard M, Merlet J, Pemberton JM, Pujol B, *et al.* (2019). RAD-sequencing for estimating genomic  
457 relatedness matrix-based heritability in the wild: A case study in roe deer. *Mol Ecol Resour.*
- 458 Gotteland C, Aubert D, Gibert P, Moinet M, Klein F, Game Y, *et al.* (2014). Toxoplasmosis in natural populations of ungulates  
459 in France: prevalence and spatiotemporal variations. *Vector-Borne Zoonotic Dis* **14**: 403–413.
- 460 Grueber CE, Wallis GP, Jamieson IG (2013). Genetic drift outweighs natural selection at toll-like receptor (TLR) immunity loci  
461 in a re-introduced population of a threatened species. *Mol Ecol* **22**: 4470–4482.
- 462 Hedrick PW (1999). Antagonistic pleiotropy and genetic polymorphism: a perspective. *Heredity* **82**: 126–133.
- 463 Hedrick PW (2002). Pathogen resistance and genetic variation at MHC loci. *Evolution* **56**: 1902–1908.
- 464 Hedrick PW (2006). Genetic polymorphism in heterogeneous environments: the age of genomics. *Annu Rev Ecol Evol Syst*  
465 **37**: 67–93.
- 466 Hedrick PW (2012). What is the evidence for heterozygote advantage selection? *Trends Ecol Evol* **27**: 698–704.
- 467 Hewison A, Morellet N, Verheyden H, Daufresne T, Angibault J, Cargnelutti B, *et al.* (2009). Landscape fragmentation  
468 influences winter body mass of roe deer. *Ecography* **32**: 1062–1070.
- 469 Hill AV (1991). HLA associations with malaria in Africa: some implications for MHC evolution. In: *Molecular evolution of the*  
470 *major histocompatibility complex*, Springer, pp 403–420.
- 471 Hughes AL, Nei M (1992). Models of host-parasite interaction and MHC polymorphism. *Genetics* **132**: 863.
- 472 Hughes AL, Yeager M (1998). Natural selection and the evolutionary history of major histocompatibility complex loci. *Front*  
473 *Biosci J Virtual Libr* **3**: d509-516.
- 474 Jepson A, Banya W, Sisay-Joof F, Hassan-King M, Nunes C, Bennett S, *et al.* (1997). Quantification of the relative  
475 contribution of major histocompatibility complex (MHC) and non-MHC genes to human immune responses to  
476 foreign antigens. *Infect Immun* **65**: 872–876.
- 477 Johnston SE, Gratten J, Berenos C, Pilkington JG, Clutton-Brock TH, Pemberton JM, *et al.* (2013). Life history trade-offs at a  
478 single locus maintain sexually selected genetic variation. *Nature* **502**: 93.

- 479 Kaisho T, Akira S (2004). Pleiotropic function of Toll-like receptors. *Microbes Infect* **6**: 1388–1394.
- 480 Kamath PL, Turner WC, Küsters M, Getz WM (2014). Parasite-mediated selection drives an immunogenetic trade-off in  
481 plains zebras (*Equus quagga*). *Proc R Soc Lond B Biol Sci* **281**: 20140077.
- 482 Klein SL (2000). The effects of hormones on sex differences in infection: from genes to behavior. *Neurosci Biobehav Rev* **24**:  
483 627–638.
- 484 Klein J, Figueroa F (1986). Evolution of the major histocompatibility complex. *Crit Rev Immunol* **6**: 295–386.
- 485 Kloch A, Wenzel MA, Laetsch DR, Michalski O, Welc-Falęciak R, Piertney SB (2018). Signatures of balancing selection in toll-  
486 like receptor (TLRs) genes—novel insights from a free-living rodent. *Sci Rep* **8**: 8361.
- 487 Kubinak JL, Ruff JS, Hyzer CW, Slev PR, Potts WK (2012). Experimental viral evolution to specific host MHC genotypes reveals  
488 fitness and virulence trade-offs in alternative MHC types. *Proc Natl Acad Sci* **109**: 3422–3427.
- 489 Lam-Yuk-Tseung S, Gros P (2003). Genetic control of susceptibility to bacterial infections in mouse models. *Cell Microbiol* **5**:  
490 299–313.
- 491 Landry C, Bernatchez L (2001). Comparative analysis of population structure across environments and geographical scales at  
492 major histocompatibility complex and microsatellite loci in Atlantic salmon (*Salmo salar*). *Mol Ecol* **10**: 2525–2539.
- 493 Levene H (1953). Genetic equilibrium when more than one ecological niche is available. *Am Nat* **87**: 331–333.
- 494 Lewontin RC, Hubby JL (1966). A molecular approach to the study of genic heterozygosity in natural populations. II. Amount  
495 of variation and degree of heterozygosity in natural populations of *Drosophila pseudoobscura*. *Genetics* **54**: 595.
- 496 Loiseau C, Zoorob R, Garnier S, Birard J, Federici P, Julliard R, *et al.* (2008). Antagonistic effects of a Mhc class I allele on  
497 malaria-infected house sparrows. *Ecol Lett* **11**: 258–265.
- 498 Maizels RM, Nussey DH (2013). Into the wild: digging at immunology's evolutionary roots. *Nat Immunol* **14**: 879.
- 499 McClelland EE, Penn DJ, Potts WK (2003). Major histocompatibility complex heterozygote superiority during coinfection.  
500 *Infect Immun* **71**: 2079–2086.
- 501 Miller CM, Boulter NR, Ikin RJ, Smith NC (2009). The immunobiology of the innate response to *Toxoplasma gondii*. *Int J*  
502 *Parasitol* **39**: 23–39.
- 503 Møller AP, Saino N (2004). Immune response and survival. *Oikos* **104**: 299–304.
- 504 Moore AJ, Moore PJ (1999). Balancing sexual selection through opposing mate choice and male competition. *Proc R Soc*  
505 *Lond B Biol Sci* **266**: 711–716.
- 506 Morellet N, Bonenfant C, Börger L, Ossi F, Cagnacci F, Heurich M, *et al.* (2013). Seasonality, weather and climate affect  
507 home range size in roe deer across a wide latitudinal gradient within Europe. *J Anim Ecol* **82**: 1326–1339.
- 508 Mun H-S, Aosai F, Norose K, Chen M, Piao L-X, Takeuchi O, *et al.* (2003). TLR2 as an essential molecule for protective  
509 immunity against *Toxoplasma gondii* infection. *Int Immunol* **15**: 1081–1087.
- 510 Netea M, Wijmenga C, O'Neill L (2012). Genetic variation in Toll-like receptors and disease susceptibility. *Nat Immunol* **13**:  
511 535–542.
- 512 Oliver MK, Telfer S, Piertney SB (2009). Major histocompatibility complex (MHC) heterozygote superiority to natural multi-  
513 parasite infections in the water vole (*Arvicola terrestris*). *Proc R Soc Lond B Biol Sci* **276**: 1119–1128.
- 514 de Oliveira Nascimento L, Massari P, Wetzler LM (2012). The role of TLR2 in infection and immunity. *Front Immunol* **3**: 79.
- 515 Opsteegh M, Swart A, Fonville M, Dekkers L, Van Der Giessen J (2011). Age-related *Toxoplasma gondii* seroprevalence in  
516 Dutch wild boar inconsistent with lifelong persistence of antibodies. *PLoS One* **6**: e16240.
- 517 Parham P (2003). Innate immunity: the unsung heroes. *Nature* **423**: 20–20.



- 518 Paterson S, Wilson K, Pemberton JM (1998). Major histocompatibility complex variation associated with juvenile survival  
519 and parasite resistance in a large unmanaged ungulate population (*Ovis aries* L.). *Proc Natl Acad Sci* **95**: 3714–  
520 3719.
- 521 Pedersen AB, Greives TJ (2008). The interaction of parasites and resources cause crashes in a wild mouse population. *J Anim*  
522 *Ecol* **77**: 370–377.
- 523 Phillips KP, Cable J, Mohammed RS, Herdegen-Radwan M, Raubic J, Przesmycka KJ, *et al.* (2018). Immunogenetic novelty  
524 confers a selective advantage in host–pathogen coevolution. *Proc Natl Acad Sci*: 201708597.
- 525 Pioz M, Loison A, Gauthier D, Gibert P, Jullien J-M, Artois M, *et al.* (2008). Diseases and reproductive success in a wild  
526 mammal: example in the alpine chamois. *Oecologia* **155**: 691–704.
- 527 Piry S, Guivier E, Realini A, Martin J (2012). SESAME Barcode: NGS-oriented software for amplicon characterization–  
528 application to species and environmental barcoding. *Mol Ecol Resour* **12**: 1151–1157.
- 529 Quéméré E, Galan M, Cosson J-F, Klein F, Aulagnier S, Gilot-Fromont E, *et al.* (2015). Immunogenetic heterogeneity in a  
530 widespread ungulate: the European roe deer (*Capreolus capreolus*). *Mol Ecol*.
- 531 Raby A-C, Holst B, Davies J, Colmont C, Laumonier Y, Coles B, *et al.* (2011). TLR activation enhances C5a-induced pro-  
532 inflammatory responses by negatively modulating the second C5a receptor, C5L2. *Eur J Immunol* **41**: 2741–2752.
- 533 Roff DA, Fairbairn DJ (2007). The evolution of trade-offs: where are we? *J Evol Biol* **20**: 433–447.
- 534 Romano JD, Coppens I (2013). Host Organelle Hijackers: a similar modus operandi for *Toxoplasma gondii* and *Chlamydia*  
535 *trachomatis*: co-infection model as a tool to investigate pathogenesis. *Pathog Dis* **69**: 72–86.
- 536 Rose MR (1982). Antagonistic pleiotropy, dominance, and genetic variation. *Heredity* **48**: 63.
- 537 Seabury CM, Bhattarai EK, Taylor JF, Viswanathan GG, Cooper SM, Davis DS, *et al.* (2011). Genome-wide polymorphism and  
538 comparative analyses in the white-tailed deer (*Odocoileus virginianus*): a model for conservation genomics. *PLoS*  
539 *One* **6**: e15811.
- 540 Sevila J, Richomme C, Hoste H, Candela MG, Gilot-Fromont E, Rodolakis A, *et al.* (2014). Does land use within the home  
541 range drive the exposure of roe deer (*Capreolus capreolus*) to two abortive pathogens in a rural agro-ecosystem?  
542 *Acta Theriol (Warsz)* **59**: 571–581.
- 543 Sin YW, Annavi G, Dugdale HL, Newman C, Burke T, MacDonald DW (2014). Pathogen burden, co-infection and major  
544 histocompatibility complex variability in the European badger (*Meles meles*). *Mol Ecol* **23**: 5072–5088.
- 545 Sommer S (2005). The importance of immune gene variability (MHC) in evolutionary ecology and conservation. *Front Zool* **2**:  
546 16.
- 547 Spurgin L, Richardson D (2010). How pathogens drive genetic diversity: MHC, mechanisms and misunderstandings. *Proc Biol*  
548 *Sci* **277**: 979–988.
- 549 Stoffel MA, Nakagawa S, Schielzeth H (2017). rptR: Repeatability estimation and variance decomposition by generalized  
550 linear mixed-effects models. *Methods Ecol Evol* **8**: 1639–1644.
- 551 Takahata N, Nei M (1990). Allelic genealogy under overdominant and frequency-dependent selection and polymorphism of  
552 major histocompatibility complex loci. *Genetics* **124**: 967–978.
- 553 Tang JW (2009). The effect of environmental parameters on the survival of airborne infectious agents. *J R Soc Interface* **6**:  
554 S737–S746.
- 555 Tenter AM, Heckerth AR, Weiss LM (2000). *Toxoplasma gondii*: from animals to humans. *Int J Parasitol* **30**: 1217–1258.
- 556 Tollenaere C, Bryja J, Galan M, Cadet P, Deter J, Chaval Y, *et al.* (2008). Multiple parasites mediate balancing selection at  
557 two MHC class II genes in the fossorial water vole: insights from multivariate analyses and population genetics. *J*  
558 *Evol Biol* **21**: 1307–1320.

- 559 Trowsdale J, Parham P (2004). Mini-review: defense strategies and immunity-related genes. *Eur J Immunol* **34**: 7–17.
- 560 Tschirren B, Andersson M, Scherman K, Westerdahl H, Mittl P, Raberg L (2013). Polymorphisms at the innate immune  
561 receptor TLR2 are associated with *Borrelia* infection in a wild rodent population. *Proc Biol Sci* **280**: 20130364.
- 562 Turner AK, Begon M, Jackson JA, Bradley JE, Paterson S (2011). Genetic Diversity in Cytokines Associated with Immune  
563 Variation and Resistance to Multiple Pathogens in a Natural Rodent Population. *PLoS Genet* **7**: e1002343.
- 564 Wegner KM, Kalbe M, Kurtz J, Reusch TB, Milinski M (2003). Parasite selection for immunogenetic optimality. *Science* **301**:  
565 1343–1343.
- 566 Wellenreuther M (2017). Balancing selection maintains cryptic colour morphs. *Mol Ecol* **26**: 6185–6188.
- 567 Yang X, Joyee A (2008). Role of toll-like receptors in immune responses to chlamydial infections. *Curr Pharm Des* **14**: 593–  
568 600.
- 569 Yarovinsky F (2008). Toll-like receptors and their role in host resistance to *Toxoplasma gondii*. *Immunol Lett* **119**: 17–21.
- 570 Zuur A, Ieno EN, Walker N, Saveliev AA, Smith GM (2009). *Mixed effects models and extensions in ecology with R*. Springer  
571 Science & Business Media.

572 **Figures legends.**

573 **Figure 1.** Genetic polymorphisms at *Tlr2* are associated with both *Chlamydia* and *Toxoplasma*  
574 serological status. (a) Predicted seroprevalence of *Toxoplasma* and *Chlamydia* in roe deer with the  
575 number of copies (0/1/2) of *Tlr2-2*, (b) Predicted seroprevalence of *Chlamydia* with the number of  
576 copies (0/1/2) of *Tlr2-1* (c) Predicted prevalence of *Toxoplasma* with the presence/absence of *Tlr2-1*.

577

578 **Tables**

579 **Table 1 - Summary of the pathogen data** (number of samples per year in brackets). NA indicates the years for  
580 which no data were available.

| Pathogen          | Number of samples | Number of individuals | Overall seroprevalence | Seroprevalence evaluated per year |              |              |              |              |              |              |             |              |
|-------------------|-------------------|-----------------------|------------------------|-----------------------------------|--------------|--------------|--------------|--------------|--------------|--------------|-------------|--------------|
|                   |                   |                       |                        | 2008                              | 2009         | 2010         | 2011         | 2012         | 2013         | 2014         | 2015        | 2016         |
| <i>Toxoplasma</i> | 351               | 277                   | 0.35                   | 0.23<br>(40)                      | 0.83<br>(42) | 0.56<br>(43) | 0.24<br>(50) | 0.21<br>(42) | 0.24<br>(38) | 0.16<br>(31) | 0.3<br>(49) | 0.43<br>(16) |
| <i>Chlamydia</i>  | 232               | 196                   | 0.16                   | 0.00<br>(40)                      | 0.14<br>(41) | 0.37<br>(43) | 0.28<br>(50) | 0.05<br>(42) | 0.00<br>(16) | NA           | NA          | NA           |
| coinfection       | 232               | 196                   | 0.08                   | 0<br>(40)                         | 5<br>(41)    | 11<br>(43)   | 2<br>(50)    | 0<br>(42)    | 0<br>(16)    | NA           | NA          | NA           |

581

582 **Table 2. Performance of the best-fitted generalized linear mixed-effect models of *Toxoplasma* and *Chlamydia***  
583 **seroprevalence** (with  $\Delta AIC < 2$  relative to the best model). '*Toxoplasma*' models all included *age* as a fixed  
584 factor and individual *ID*, *year* and *capture sectors* as random factors. '*Chlamydia*' models included animal ID  
585 and year as random factors. 'n' refers to the number of seroprevalence data. The selected models occur in  
586 bold. 'k' refers to the number of model parameters. 'nb(*haplotype*)' refers to the number of copies of the  
587 haplotype. h(*gene*) refers to the heterozygosity status of the gene (0/1).

| <i>Toxoplasma</i> (n=351) |          |              |               |              | <i>Chlamydia</i> (n=232)         |          |              |               |              |
|---------------------------|----------|--------------|---------------|--------------|----------------------------------|----------|--------------|---------------|--------------|
|                           | k        | AICc         | $\Delta AICc$ | AICcWt       |                                  | k        | AICc         | $\Delta AICc$ | AICcWt       |
| <b>nb(Tlr2-2)</b>         | <b>7</b> | <b>382.1</b> | <b>-5.71</b>  | <b>0.416</b> | <b>nb(Tlr2-2)+nb(Tlr5-2)</b>     | <b>6</b> | <b>166.5</b> | <b>-7.35</b>  | <b>0.430</b> |
| nb(Tlr2-2)+h(Tlr4)        | 8        | 383.6        | -4.28         | 0.204        | nb(Tlr2-1)+nb(Tlr5-2)            | 6        | 167.8        | -5.96         | 0.215        |
| nb(Tlr2-2)+nb(Tlr4-4)     | 9        | 383.7        | -4.15         | 0.192        | nb(Tlr2-2)+nb(Tlr5-2)+nb(Tlr4-4) | 8        | 168.1        | -5.71         | 0.190        |
| nb(Tlr2-2)+h(Tlr5)        | 8        | 383.7        | -4.11         | 0.188        | nb(Tlr2-2)+nb(Tlr5-2)+h(Tlr4-4)  | 7        | 168.4        | -5.44         | 0.165        |
| Non-genetic model         | 5        | 387.65       | 0             |              | Non-genetic model                | 2        | 173.7        | 0             |              |

588

589 **Supporting information**

590 **Table S1.** Summary of the 13 *Tlr* SNPs genotyped using the KASPar SNP genotyping system.

591 **Table S2.** Details of primer sequences, product size and Genbank accessions.

592 **Table S3.** Sample size per year and site for *Toxoplasma* and *Chlamydia*.

593 **Table S4.** Full list and performance of models tested for genetic association with *Chlamydia* and  
594 *Toxoplasma* seroprevalence.

595 **Table S5.** Prevalence of *Toxoplasma* and *Chlamydia* in the three sectors.

596 **Table S6.** Full list and performance of non-genetic models of *Chlamydia* and *Toxoplasma*  
597 seroprevalence.

598 **Table S7.** Parameter estimates from the best-fitted generalized linear mixed-effect describing  
599 variation in *Toxoplasma* seroprevalence as a function of age and number of copies of the *Tlr2-2*  
600 haplotype.

601 **Table S8.** Parameter estimates from the best-fitted generalized linear mixed-effect describing  
602 variation in *Chlamydia* seroprevalence as a function number of copies of the *Tlr2-2* and *Tlr5-2*  
603 haplotypes.

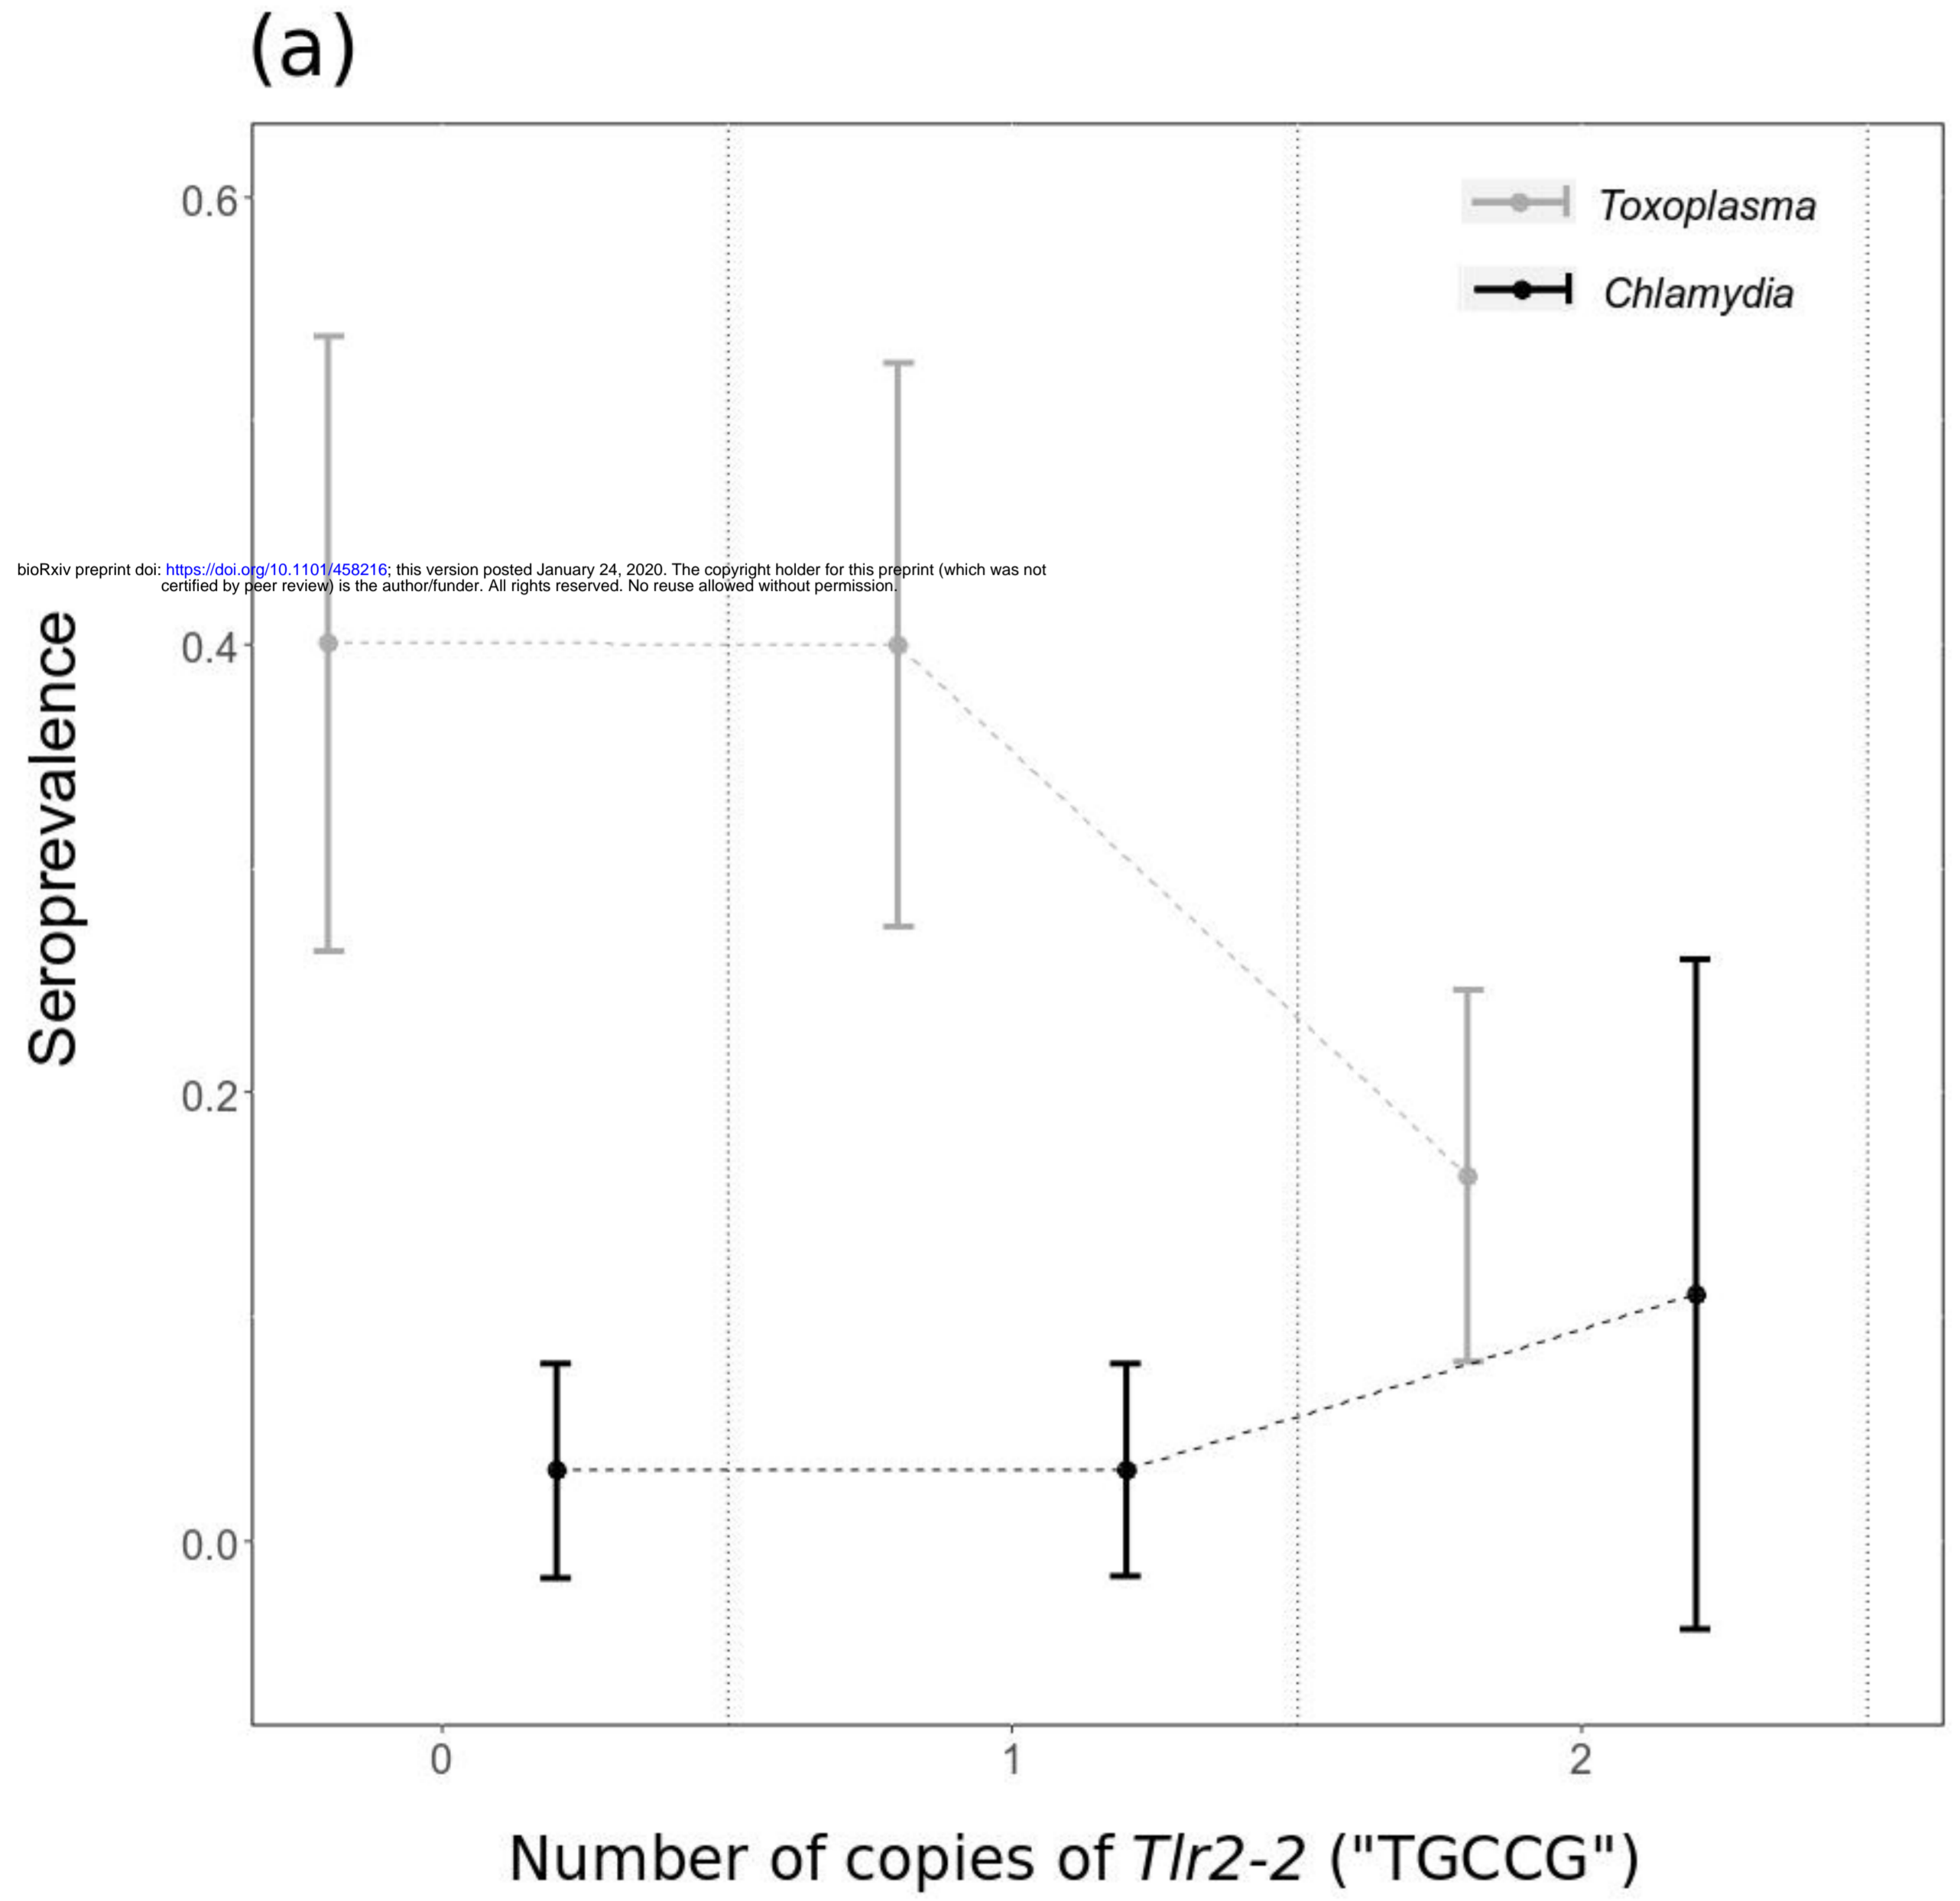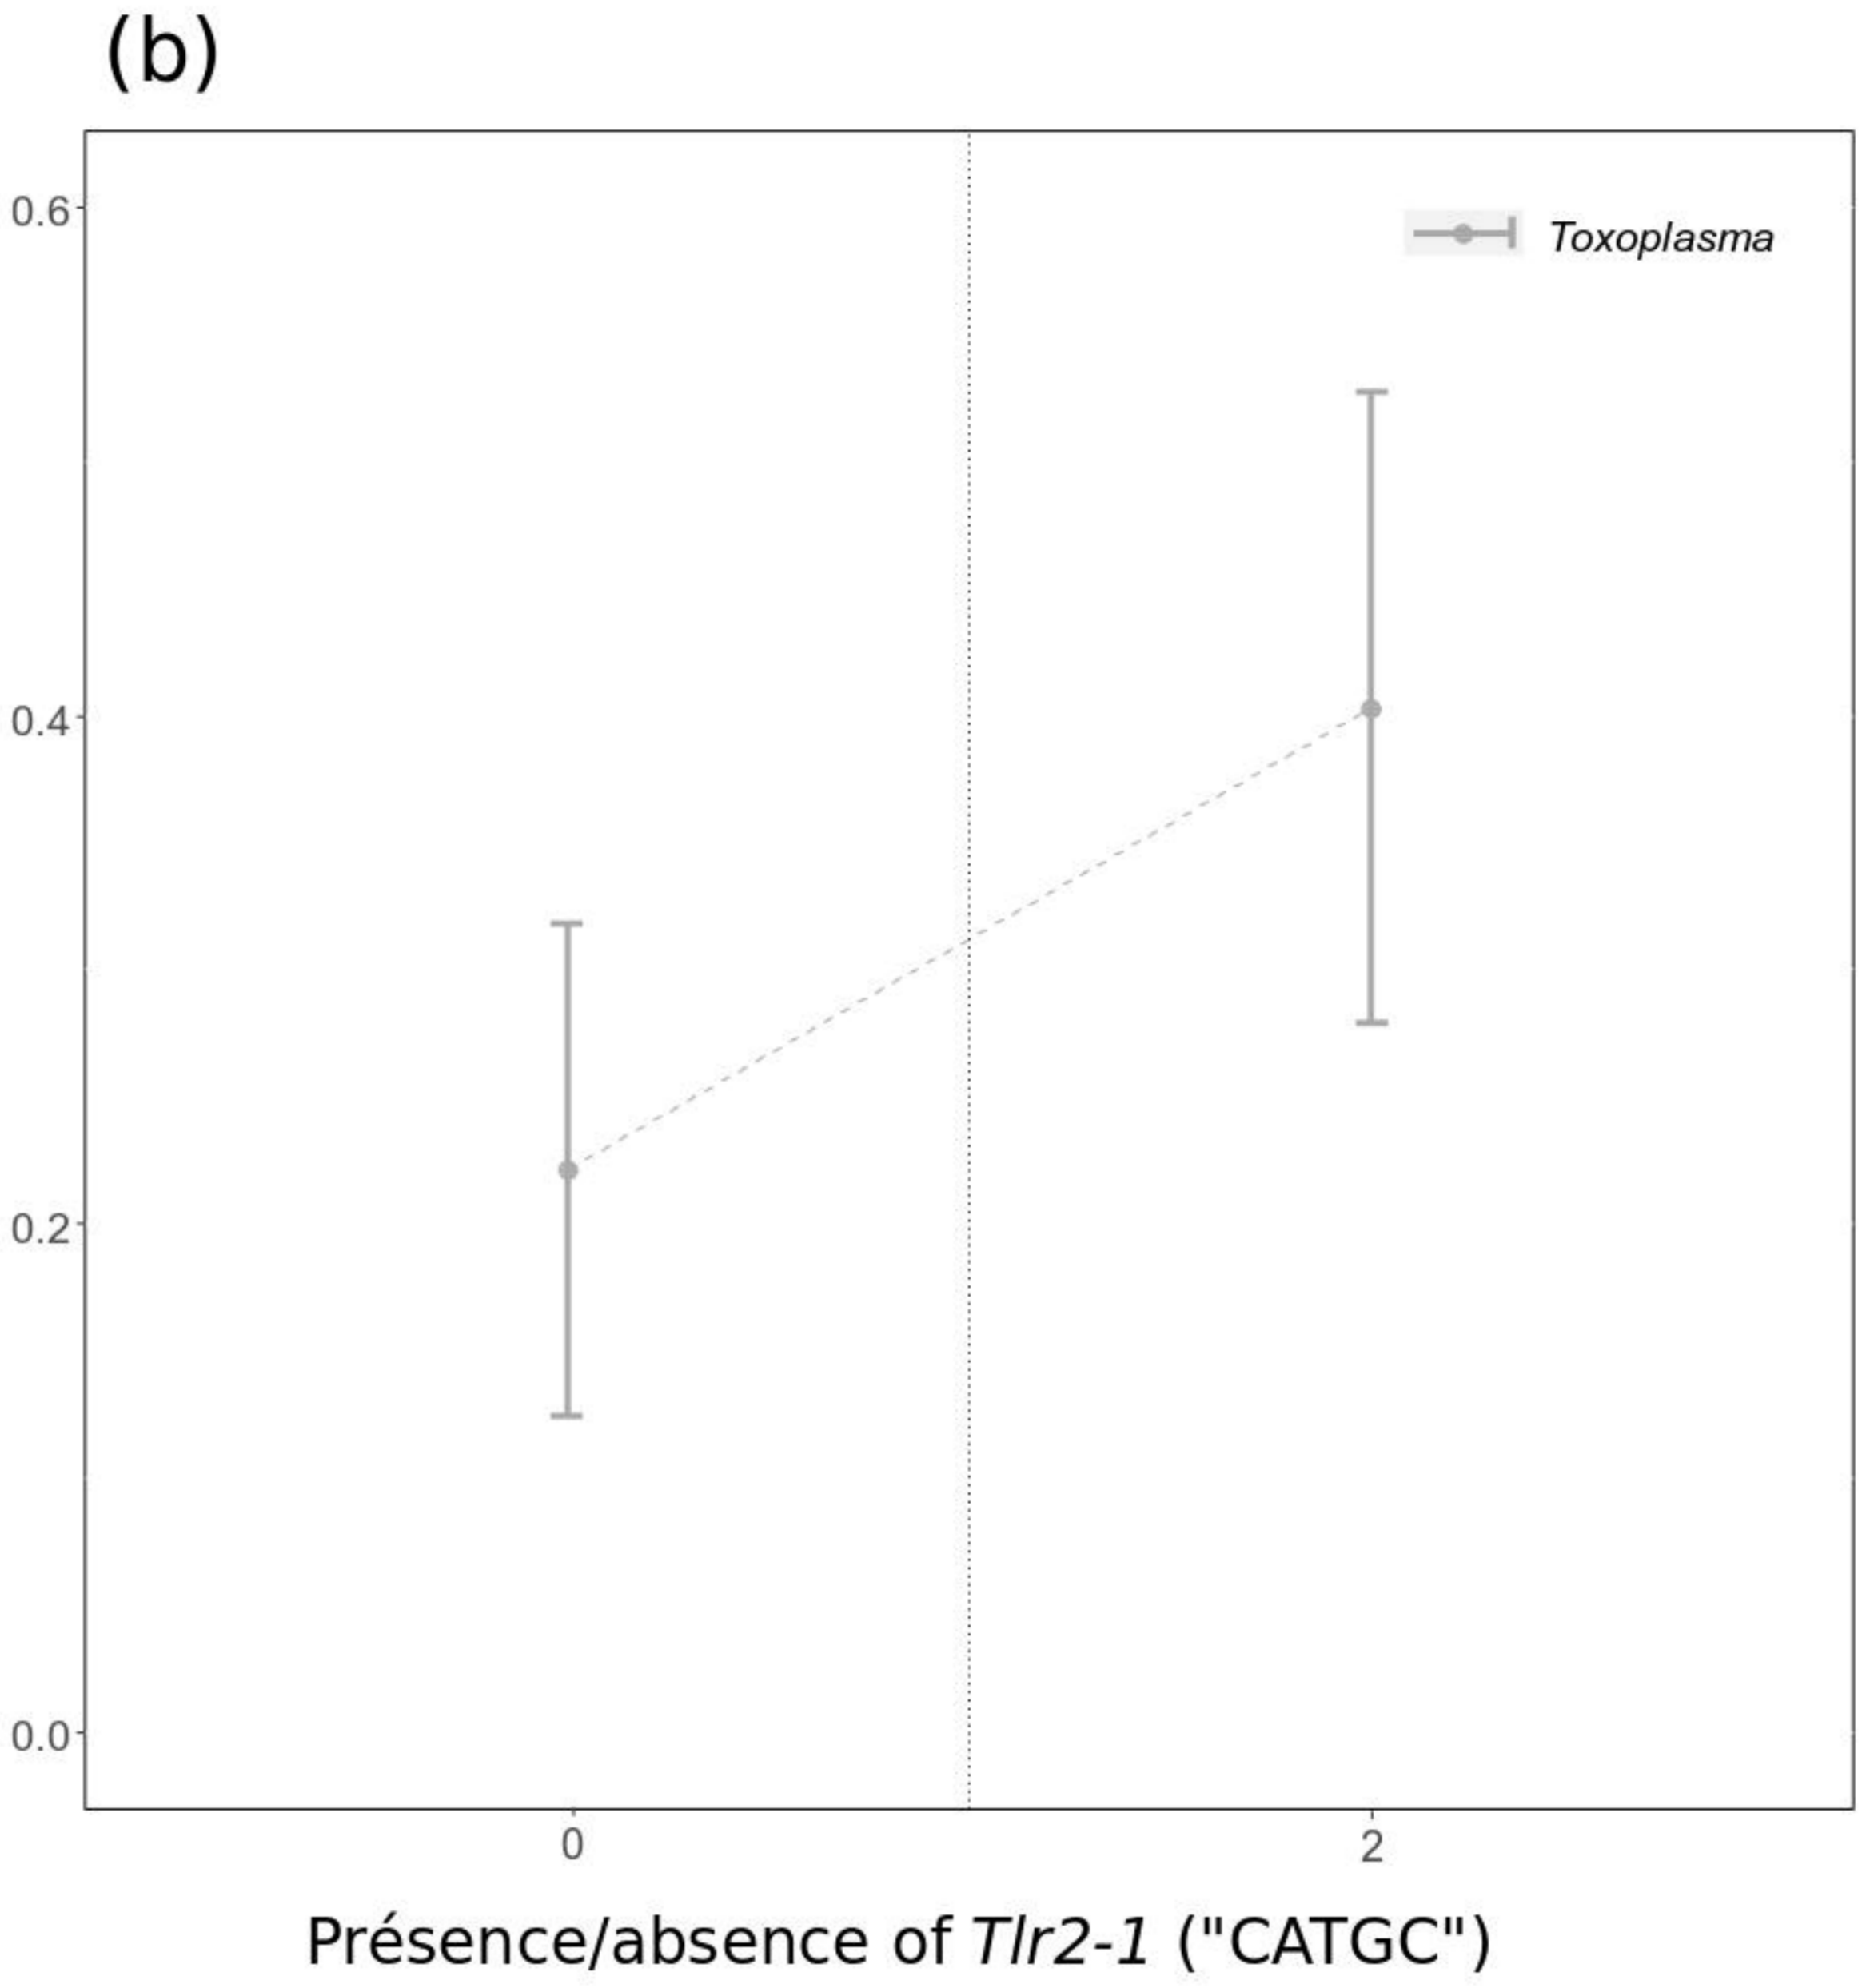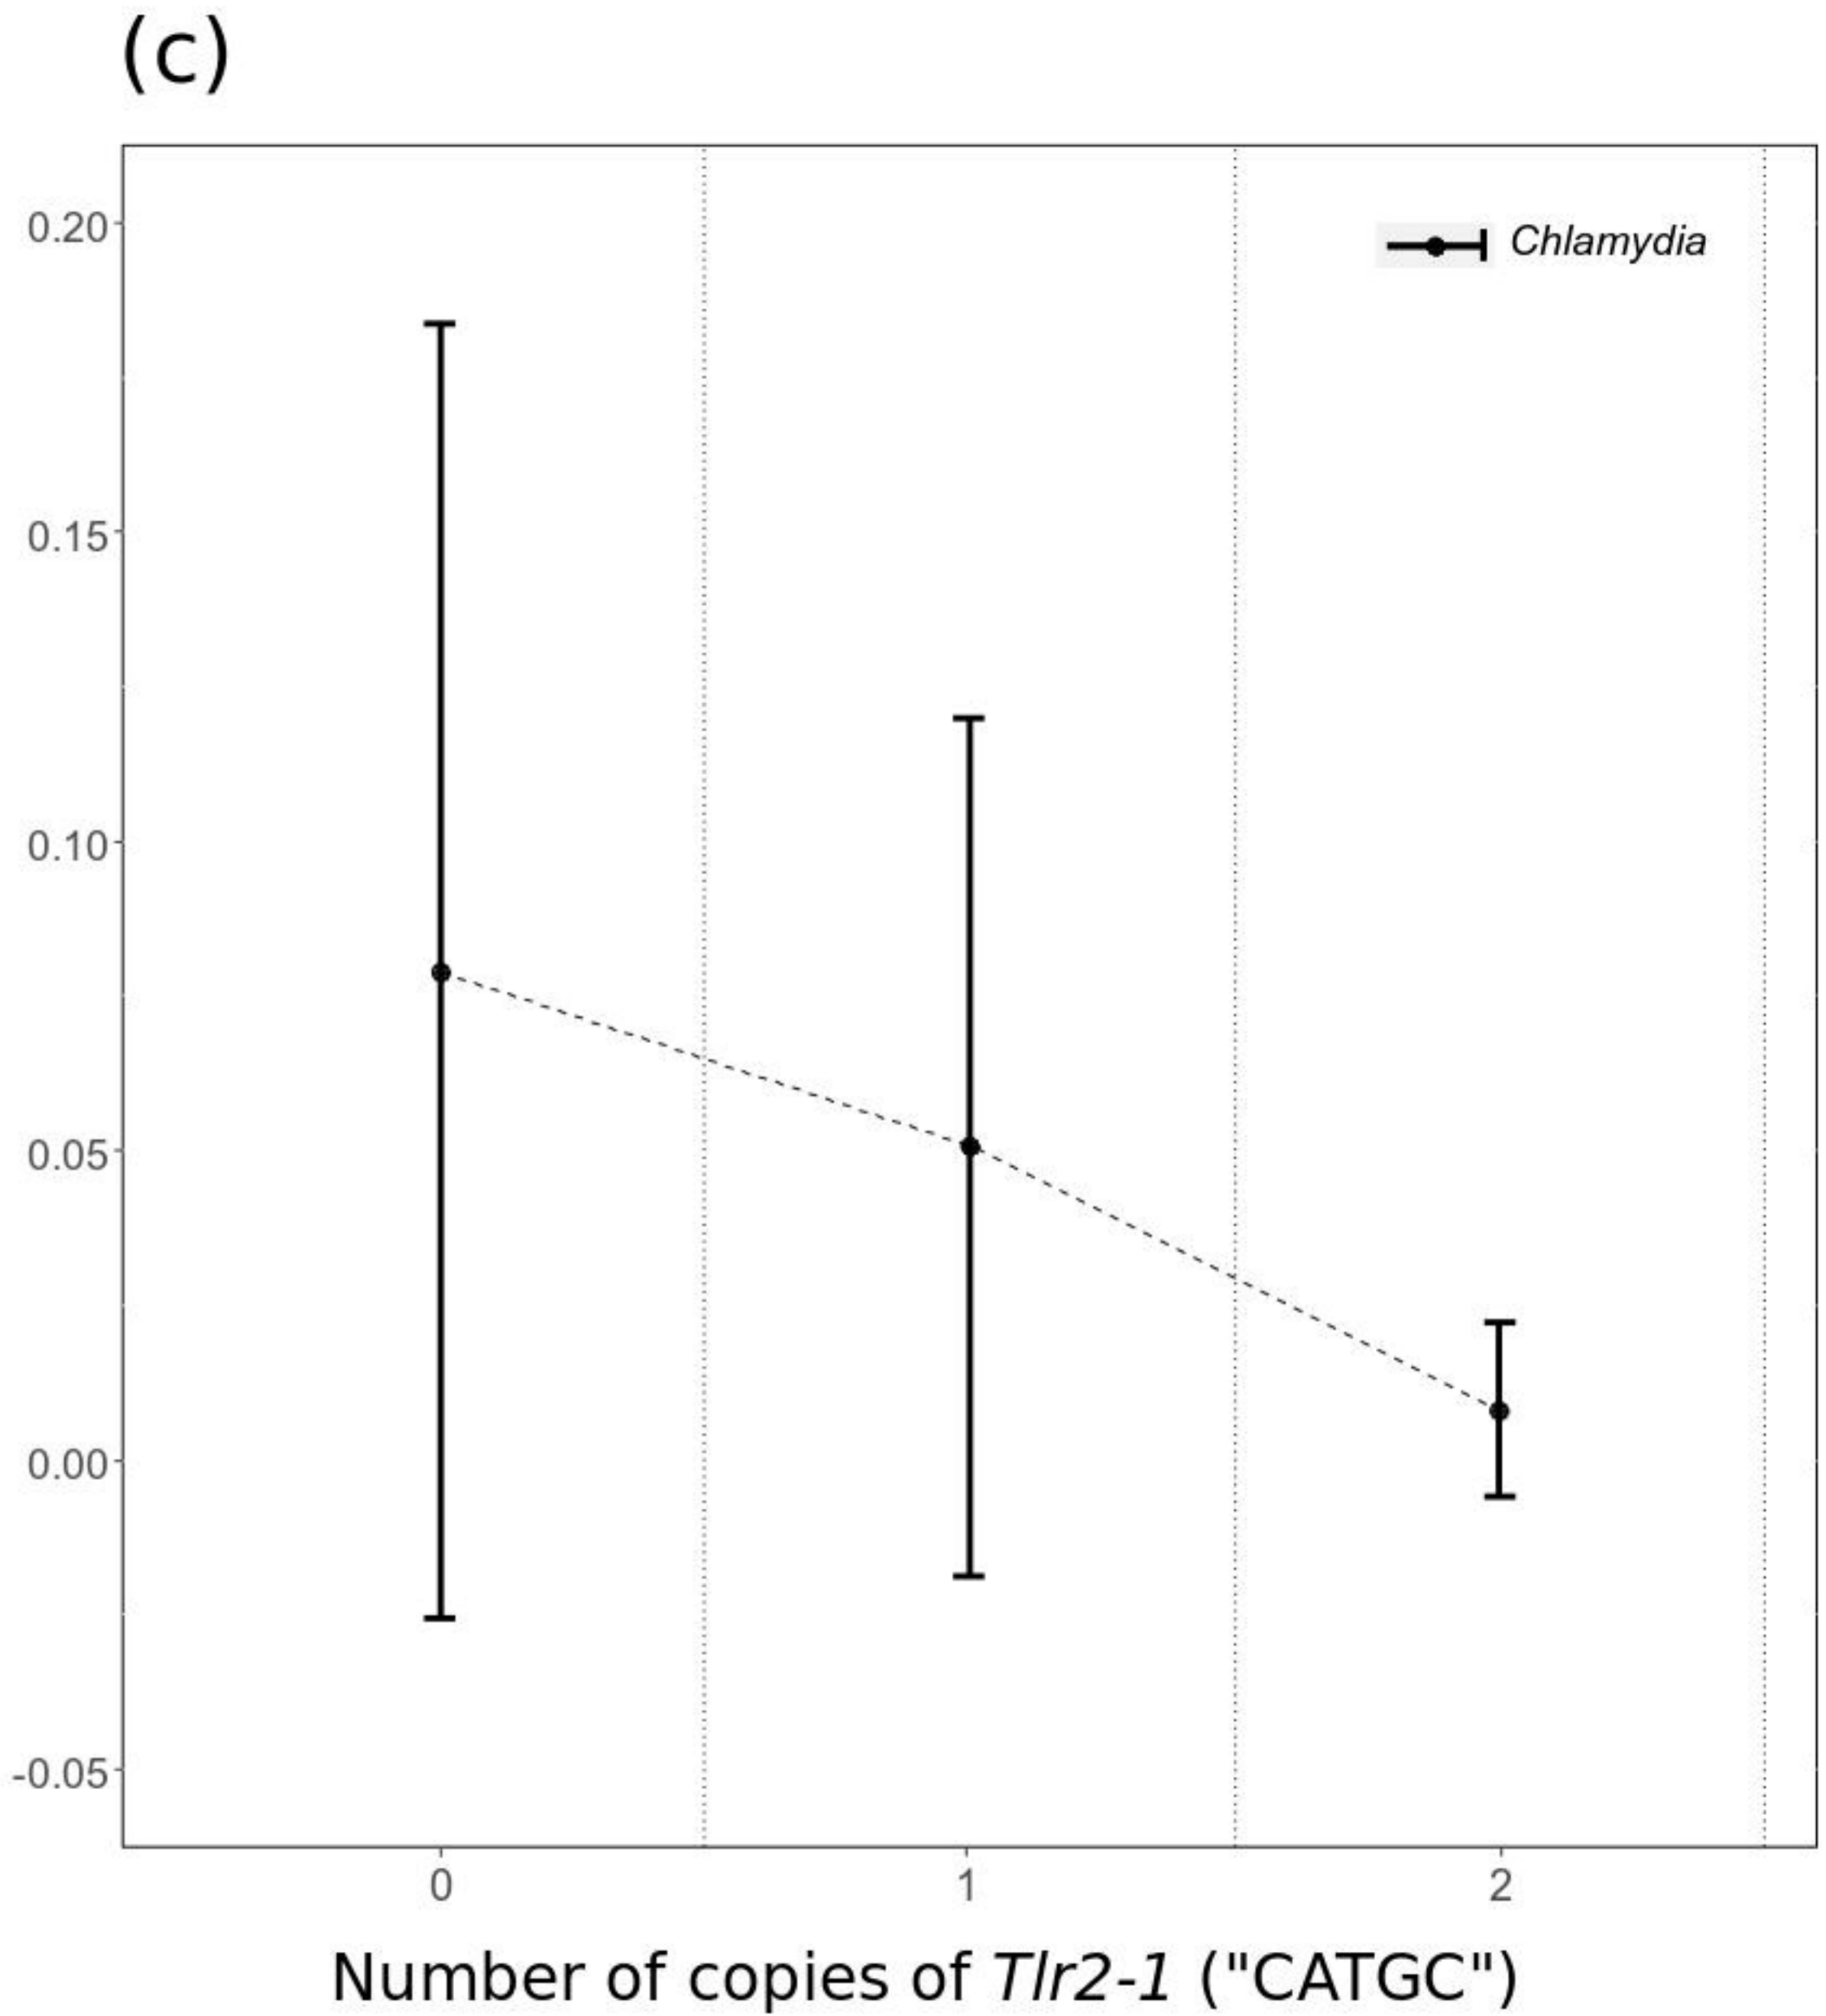

Source: https://www.biorxiv.org/content/10.1101/458216v4.full.pdf
